# Supplementary material for: Estimating the impact of Angelman syndrome on parental productivity in Australia using productivity-adjusted life years
Source: bioRxiv or medRxiv preprint supplement (doi:10.1101/2021.06.03.21258279), 2022-07-05
Supplement: Supplementary file [file media-1.pdf]

## **Supplementary information**

### **Model inputs**

The key cost-of-illness model inputs are detailed in Table S1.

**Table S1. Key cost-of-illness model inputs**

| <b>Parameter</b>                             | <b>Value (units)</b>                                                 | <b>Assumptions*</b> |
|----------------------------------------------|----------------------------------------------------------------------|---------------------|
| <b>AS prevalence</b>                         |                                                                      |                     |
| AS population prevalence, lower scenario     | 0.001 (percentage of the population, %) <sup>1</sup>                 | A1                  |
| AS population prevalence, upper scenario     | 0.01 (percentage of the population, %) <sup>2</sup>                  | A1                  |
| Disabled population age and sex distribution | Age and sex dependent <sup>3</sup>                                   | A2                  |
| AS population life expectancy                | 70.00 (years of age) <sup>4,5</sup>                                  | A3                  |
| <b>Parental prevalence</b>                   |                                                                      |                     |
| Average parental age at child's birth        | Age and sex dependent <sup>6</sup>                                   | A4-A8, A19          |
| <b>PALYs lost</b>                            |                                                                      |                     |
| Average paternal workforce participation     | 97.27 (percentage of fathers, %) <sup>7</sup>                        | A10-A12, A15        |
| Average maternal workforce participation     | 47.42 (percentage of mothers, %) <sup>7</sup>                        | A10-A12, A15        |
| Attributable absenteeism                     | 7.15 (hours per week) <sup>8</sup>                                   | A14, A15            |
| Attributable presenteeism                    | 58.00 (percentage of total working time, %) <sup>8</sup>             | A14, A15            |
| Average workforce participation rate         | Age and sex dependent (percentage of the population, %) <sup>9</sup> | A16                 |
| <b>Cost to society</b>                       |                                                                      |                     |

| <b>Parameter</b>                                        | <b>Value (units)</b>                                                  | <b>Assumptions*</b> |
|---------------------------------------------------------|-----------------------------------------------------------------------|---------------------|
| Gross domestic product (GDP) per hour worked per person | 100.00 (Australian dollars, AUD\$) <sup>10</sup>                      | A17, A18            |
| Proportion full-time equivalent (FTE)                   | Age and sex dependent (percentage of the population, %) <sup>9</sup>  |                     |
| <b>Background</b>                                       |                                                                       |                     |
| General population, total                               | 25,365,745.00 (number of people) <sup>11</sup>                        | -                   |
| General population, mortality rate                      | Age and sex dependent (percentage of the population, %) <sup>12</sup> | A9                  |
| Annual discount rate                                    | 5.00 (percentage per annum, %) <sup>13</sup>                          | A19                 |

\*Refer to Supplementary Table S4 for more detail.

### *Parental productivity index*

The parental productivity index cost-of-illness model inputs are detailed in Table S2.

**Table S2. Parental productivity cost-of-illness model inputs**

| <b>Parameter</b>                | <b>Fathers</b> | <b>Mothers</b> |
|---------------------------------|----------------|----------------|
| Average workforce participation | 97.27%         | 47.42%         |
| AS attributable absenteeism     | 19.07%         | 19.07%         |
| AS attributable presenteeism    | 58.00%         | 58.00%         |
| Productivity index              | 0.33           | 0.16           |

### *Control productivity index*

The control productivity index cost-of-illness model inputs are detailed in Table S3.

**Table S3. Control productivity index cost-of-illness model inputs**

| <b>Age group</b> | <b>Average workforce participation</b> | <b>AS attributable absenteeism</b> | <b>AS attributable presenteeism</b> | <b>Productivity index</b> |
|------------------|----------------------------------------|------------------------------------|-------------------------------------|---------------------------|
| <b>Males</b>     |                                        |                                    |                                     |                           |
| 20–24            | 53.59%                                 | 0.00%                              | 0.00%                               | 0.54                      |
| 25–29            | 68.17%                                 | 0.00%                              | 0.00%                               | 0.68                      |
| 30–34            | 69.94%                                 | 0.00%                              | 0.00%                               | 0.70                      |
| 35–39            | 64.58%                                 | 0.00%                              | 0.00%                               | 0.65                      |
| 40–44            | 72.06%                                 | 0.00%                              | 0.00%                               | 0.72                      |
| 45–49            | 56.93%                                 | 0.00%                              | 0.00%                               | 0.57                      |
| 50–54            | 62.61%                                 | 0.00%                              | 0.00%                               | 0.63                      |
| 55–59            | 50.30%                                 | 0.00%                              | 0.00%                               | 0.50                      |
| 60–64            | 37.51%                                 | 0.00%                              | 0.00%                               | 0.38                      |
| 65–69            | 21.53%                                 | 0.00%                              | 0.00%                               | 0.22                      |
| <b>Females</b>   |                                        |                                    |                                     |                           |
| 20–24            | 45.67%                                 | 0.00%                              | 0.00%                               | 0.46                      |
| 25–29            | 56.56%                                 | 0.00%                              | 0.00%                               | 0.57                      |
| 30–34            | 55.96%                                 | 0.00%                              | 0.00%                               | 0.56                      |
| 35–39            | 48.33%                                 | 0.00%                              | 0.00%                               | 0.48                      |

| <b>Age group</b> | <b>Average workforce participation</b> | <b>AS attributable absenteeism</b> | <b>AS attributable presenteeism</b> | <b>Productivity index</b> |
|------------------|----------------------------------------|------------------------------------|-------------------------------------|---------------------------|
| 40-44            | 54.02%                                 | 0.00%                              | 0.00%                               | 0.54                      |
| 45-49            | 50.24%                                 | 0.00%                              | 0.00%                               | 0.50                      |
| 50-54            | 54.66%                                 | 0.00%                              | 0.00%                               | 0.55                      |
| 55-59            | 44.60%                                 | 0.00%                              | 0.00%                               | 0.45                      |
| 60-64            | 31.16%                                 | 0.00%                              | 0.00%                               | 0.31                      |
| 65-69            | 15.09%                                 | 0.00%                              | 0.00%                               | 0.15                      |

## Assumptions

The assumptions underlying the cost-of-illness modelling approach are detailed in Table S4.

**Table S4. Assumptions underlying the cost-of-illness modelling approach**

| <b>ID</b> | <b>Assumption</b>                                                                                                                                                                                                                                                                                                                                                                                                         |
|-----------|---------------------------------------------------------------------------------------------------------------------------------------------------------------------------------------------------------------------------------------------------------------------------------------------------------------------------------------------------------------------------------------------------------------------------|
| A1        | The prevalence of AS falls within the range of 1 in 10,000 to 1 in 86,250 <sup>1,2</sup>                                                                                                                                                                                                                                                                                                                                  |
| A2        | The age and sex distribution of AS prevalence followed the same distribution as that of the disabled population and the prevalence of AS within each age group was equally distributed                                                                                                                                                                                                                                    |
| A3        | The average life expectancy of persons with AS was 70 years <sup>4,5</sup>                                                                                                                                                                                                                                                                                                                                                |
| A4        | Each person with AS had one biological mother and one biological father who experienced productivity impacts attributable to AS                                                                                                                                                                                                                                                                                           |
| A5        | The parents of persons with AS had the same average age as all Australians when their child was born                                                                                                                                                                                                                                                                                                                      |
| A6        | The impact of average maternal and paternal ages not stated were negligible, and ages falling within the 0 to 15 years range could be taken as 15 years of age, and ages falling within the 49 (maternal) or 59 (paternal) years and over range could be taken as 49 or 59 years of age, respectively                                                                                                                     |
| A7        | The compound annual growth rate observed in average maternal and paternal age could be applied retrospectively to estimate the average maternal and paternal age for years where data is not available (i.e. from 1919 to 1974)                                                                                                                                                                                           |
| A8        | The mortality rate of persons with AS had a negligible impact on the AS attributable productivity impacts experienced by parents                                                                                                                                                                                                                                                                                          |
| A9        | The mortality rate of the parents of persons with AS was the same as that of the general population, meaning there was no parental mortality attributable to having a child with AS; therefore, the parental and control life years lived were the same                                                                                                                                                                   |
| A10       | The average workforce participation reported by the small sample size of parents of persons who participated in the natural history study of chromosome 15 imprinting disorders <sup>7</sup> was reflective of the average workforce participation of the parents of persons with AS across all age groups included in the analysis                                                                                       |
| A11       | The impact of the following data cleaning decisions on the parental productivity index estimated was negligible: blank responses were not included, siblings were not removed, data reported for partners was taken as the other biological parent, parental age was estimated by summing the age of the child at collection with the time since collection to the mid-point of the initial cycle year (i.e. 1 July 2019) |
| A12       | The parents of persons with AS who worked part-time had the same average FTE rate as the part-time general population                                                                                                                                                                                                                                                                                                     |

**ID      Assumption**

---

- A13      There were 52 paid weeks in a year, 48 working weeks in a year, 5 working days in a week and 7.5 working hours in a day
- A14      The level of parental absenteeism and presenteeism attributable to Dravet syndrome was a reasonable approximation of the parental absenteeism and presenteeism attributable to AS.is
- A15      The productivity index estimated for the parents of persons with AS was a reasonable approximation of the average productivity index across all age groups included in the analysis
- A16      Employment statistics for the age group 65 and over were mostly attributable to persons falling within the 65 to 69 age group
- A17      The hourly contributions to GDP made by parents who worked were the same as the average for all working Australians
- A18      The impact of other mechanisms by which parents contributed to the economy, such as through greater purchasing of healthcare goods and services, were negligible
- A19      Productivity adjusted life years (PALYs) and GDP contributions could be discounted at 5% per annum
-

## **Epidemiology**

### ***Supplementary notes***

Estimates of Angelman syndrome (AS) prevalence published to date range greatly from 1 in 10,000 to 1 in 86,250.<sup>1,2</sup> While estimates of AS incidence range from 1:22,305 to 1:40,000.<sup>14,15</sup> The available prevalence and incidence estimates of AS in the peer-reviewed literature are detailed in Table S5.

In Denmark, an evaluation of patients referred to a university hospital identified 5 patients with AS over 5 years, corresponding to a prevalence of 1:10,000.<sup>2</sup> By contrast, a retrospective registry review in Denmark identified 80 patients with AS out of the 6.9 million patients in the Danish National Patient Registry (DNPR) from 1994-2015, corresponding to a prevalence of 1:86,250.<sup>1</sup> The other available estimates of AS population prevalence fall within this range, with a prospective focused search in Estonia having identified 6 live individuals with AS from 2000-2004, corresponding to a prevalence of 1:56,112.<sup>16</sup> A Saudi Arabian prospective screening study identified 1 child with AS out of 45,682 children screened from 2004-2005, corresponding to a prevalence of 1:50,000.<sup>17</sup>

In Australia, a retrospective record review identified 34 patients with AS, with 26 having been born in Western Australia during the 50 years that Disability Services Commission (DSC) records were kept, corresponding to a live birth incidence of 1:40,000 among a birth population of 1.05 million.<sup>15</sup> The other available estimates of AS incidence are lower than that reported by Thomson et al (2006), with a retrospective record review in China having identified 55 patients with AS from 1995-2015, corresponding to a birth incidence of 1:22,305 among a live birth population of 1,226,780.<sup>14</sup> Similarly, in Denmark, a retrospective registry review identified 51 patients with AS from 1991-2009, corresponding to a birth incidence of 1:24,580 among a birth population of 1,250,000.<sup>18</sup>



**Table S5. Prevalence and incidence estimates of AS available in the peer-reviewed literature**

| First author                | Year | Country      | Study design                                             | Key findings                                                                                                                                                                                                                                                                                | Prevalence estimate                                        | Incidence estimate |
|-----------------------------|------|--------------|----------------------------------------------------------|---------------------------------------------------------------------------------------------------------------------------------------------------------------------------------------------------------------------------------------------------------------------------------------------|------------------------------------------------------------|--------------------|
| Jørgensen <sup>1</sup>      | 2019 | Denmark      | Retrospective registry review                            | 80 patients with AS were identified out of the 6.90 million patients in the Danish National Patient Registry (DNPR) from 1994–2015.                                                                                                                                                         | 1:86,250                                                   | -                  |
| Oiglane-Shlik <sup>16</sup> | 2006 | Estonia      | Prospective focused search                               | 7 individuals with AS were identified from 2000-2004; however, 1 individual died during the study period, corresponding to a live birth prevalence from 1984-2004 of 1:52,181 (95% CI 1:25,326-1:1,29,785) and a point prevalence of 1:56,112 (95% CI 1:25,780-1:1,52,899).                 | 1:52,181 (birth prevalence)<br>1:56,112 (point prevalence) | -                  |
| Al Salloum <sup>17</sup>    | 2015 | Saudi Arabia | Prospective screening study                              | 1 child (male) with AS was identified out of 45,682 children screened from 2004-2005, corresponding to a prevalence rate of 0.22 per 10,000 children.                                                                                                                                       | 1:50,000                                                   | -                  |
| Petersen <sup>2</sup>       | 1995 | Denmark      | Evaluation of patients referred to a university hospital | 5 patients with AS were identified over 5 years, corresponding to a prevalence rate of 1:10,000.                                                                                                                                                                                            | 1:10,000                                                   | -                  |
| Luk <sup>14</sup>           | 2016 | China        | Retrospective record review                              | 55 patients with AS were identified from 1995-2015, corresponding to a birth incidence of 1:22,305 among a live birth population of 1,226,780.                                                                                                                                              | -                                                          | 1:22,305           |
| Mertz <sup>18</sup>         | 2013 | Denmark      | Retrospective registry review                            | 51 patients with AS were identified from 1991-2009, corresponding to a birth incidence of 1:24,580 (95% CI: 1:23,727-1:25,433) among a birth population of 1,250,000.                                                                                                                       | -                                                          | 1:24,580           |
| Thomson <sup>15</sup>       | 2006 | Australia    | Retrospective record review                              | 34 patients (19 females and 15 males) with AS were identified, with 26 having been born in Western Australia during the 50 years that Disability Services Commission (DSC) records were kept, corresponding to a live birth incidence of 1:40,000 among a birth population of 1.05 million. | -                                                          | 1:40,000           |

| First author              | Year | Country   | Study design                                                          | Key findings                                                                                                                                                                                           | Prevalence estimate | Incidence estimate |
|---------------------------|------|-----------|-----------------------------------------------------------------------|--------------------------------------------------------------------------------------------------------------------------------------------------------------------------------------------------------|---------------------|--------------------|
| Tones <sup>19</sup>       | 2018 | Global    | Cross-sectional registry review                                       | Almost 470 individuals with AS had been signed up to the Global Angelman Syndrome Registry since it was launched in September 2016. 14.00% (65.8) of these individuals were from Australia.            | -                   | -                  |
| Davies <sup>20</sup>      | 2007 | UK        | Evaluation of patients referred to sequencing with suspected AS       | 11 of the 298 patients (3.69%) referred with AS or phenotypic characteristics indicative of AS were deleted at the D15S10 locus.                                                                       | -                   | -                  |
| Vercesi <sup>21</sup>     | 1999 | Brazil    | Evaluation of individuals with ID in a special school                 | 0 of the 256 boys with intellectual disability (ID) were diagnosed with AS.                                                                                                                            | -                   | -                  |
| Buckley <sup>22</sup>     | 1998 | US        | Evaluation of individuals with ID in long-term residential care       | 11 (9 female and 2 male) of the 225 residents examined were diagnosed with AS, corresponding to an incidence rate of 4.89 per 100.                                                                     | -                   | -                  |
| Hou <sup>23</sup>         | 1998 | Taiwan    | Evaluation of individuals with ID in special schools and institutions | 56 of the 11,892 patients with ID were diagnosed with AS from 1991-1996.                                                                                                                               | -                   | -                  |
| Jacobsen <sup>24</sup>    | 1998 | US        | Evaluation of individuals with ID in institutions                     | 4 of the 285 participants (1.40%) with ID were diagnosed with AS.                                                                                                                                      | -                   | -                  |
| Sandanam <sup>25</sup>    | 1997 | Australia | Evaluation of individuals with ID in institutions                     | 11 (9 male and 2 female) of 22 patients tested were diagnosed with AS.                                                                                                                                 | -                   | -                  |
| Steffenburg <sup>26</sup> | 1996 | Sweden    | Evaluation of prepubertal school-aged children                        | 4 of the 49,000 prepubertal school-aged children (6 to 3 years of age) evaluated were diagnosed with AS. 4 of the 98 children with 'mental retardation with epilepsy (MR/ERP)' were diagnosed with AS. | -                   | -                  |

## Detailed results

**Table S6. The productivity burden borne by the parents (fathers and mothers, combined) of persons AS in Australia over a 10-year period**

| Age group                        | Parental PALYs lived | Control PALYs lived | Parental PALYs lost | Proportion of PALYs lost  | Cost to society  |
|----------------------------------|----------------------|---------------------|---------------------|---------------------------|------------------|
| <b>Upper prevalence scenario</b> |                      |                     |                     |                           |                  |
| 20–24                            | -                    | -                   | -                   | -                         | \$0.00           |
| 25–29                            | -                    | -                   | -                   | -                         | \$0.00           |
| 30–34                            | 25.07                | 69.82               | 44.75               | 64%                       | \$5,030,142.57   |
| 35–39                            | 129.41               | 315.63              | 186.21              | 59%                       | \$17,877,160.95  |
| 40–44                            | 263.98               | 698.24              | 434.27              | 62%                       | \$44,890,611.83  |
| 45–49                            | 347.13               | 756.35              | 409.22              | 54%                       | \$35,222,577.21  |
| 50–54                            | 368.16               | 873.49              | 505.33              | 58%                       | \$47,491,399.83  |
| 55–59                            | 366.63               | 711.26              | 344.62              | 48%                       | \$25,957,054.94  |
| 60–64                            | 372.08               | 522.93              | 150.85              | 29%                       | \$7,940,803.66   |
| 65–69                            | 383.46               | 288.43              | (95.03)             | -33%                      | -\$3,212,776.45  |
| All ages                         | 2,255.93             | 4,236.15            | 1,980.22            | 38%<br>(weighted average) | \$181,196,974.54 |
| <b>Lower prevalence scenario</b> |                      |                     |                     |                           |                  |
| 20–24                            | -                    | -                   | -                   | -                         | \$0.00           |
| 25–29                            | -                    | -                   | -                   | -                         | \$0.00           |
| 30–34                            | 2.91                 | 8.10                | 5.19                | 64%                       | \$583,204.94     |

| Age group | Parental PALYs lived | Control PALYs lived | Parental PALYs lost | Proportion of PALYs lost  | Cost to society |
|-----------|----------------------|---------------------|---------------------|---------------------------|-----------------|
| 35–39     | 15.00                | 36.59               | 21.59               | 59%                       | \$2,072,714.31  |
| 40–44     | 30.61                | 80.96               | 50.35               | 62%                       | \$5,204,708.62  |
| 45–49     | 40.25                | 87.69               | 47.45               | 54%                       | \$4,083,777.07  |
| 50–54     | 42.69                | 101.27              | 58.59               | 58%                       | \$5,506,249.26  |
| 55–59     | 42.51                | 82.46               | 39.96               | 48%                       | \$3,009,513.62  |
| 60–64     | 43.14                | 60.63               | 17.49               | 29%                       | \$920,672.89    |
| 65–69     | 44.46                | 33.44               | (11.02)             | -33%                      | -\$372,495.82   |
| All ages  | 261.56               | 491.15              | 229.59              | 38%<br>(weighted average) | \$21,008,344.87 |

Note: A negative productivity loss was estimated for the 65-to-69-year age group due to the lack of age specific parental productivity indices, resulting in the parental population accruing greater PALYs in this age group than the control population.

**Table S7. The productivity burden borne by the fathers of persons with AS in Australia over a 10-year period**

| Age group                        | Parental PALYs lived | Control PALYs lived | Parental PALYs lost | Proportion of PALYs lost  | Cost to society |
|----------------------------------|----------------------|---------------------|---------------------|---------------------------|-----------------|
| <b>Upper prevalence scenario</b> |                      |                     |                     |                           |                 |
| 20–24                            | -                    | -                   | -                   | -                         | \$0.00          |
| 25–29                            | -                    | -                   | -                   | -                         | \$0.00          |
| 30–34                            | 12.69                | 26.85               | 14.16               | 53%                       | \$1,843,244.83  |
| 35–39                            | 69.29                | 135.34              | 66.06               | 49%                       | \$7,595,519.50  |
| 40–44                            | 159.03               | 346.59              | 187.56              | 54%                       | \$22,923,739.88 |
| 45–49                            | 233.41               | 401.90              | 168.49              | 42%                       | \$15,803,646.86 |
| 50–54                            | 250.41               | 474.20              | 223.78              | 47%                       | \$22,473,126.28 |
| 55–59                            | 243.40               | 370.27              | 126.87              | 34%                       | \$10,286,907.33 |
| 60–64                            | 245.86               | 278.93              | 33.07               | 12%                       | \$2,004,133.62  |
| 65–69                            | 247.74               | 161.36              | (86.38)             | -54%                      | -\$3,000,476.28 |
| All ages                         | 1,461.85             | 2,195.45            | 733.60              | 53%<br>(weighted average) | \$79,929,842.02 |
| <b>Lower prevalence scenario</b> |                      |                     |                     |                           |                 |
| 20–24                            | -                    | -                   | -                   | -                         | \$0.00          |
| 25–29                            | -                    | -                   | -                   | -                         | \$0.00          |
| 30–34                            | 1.47                 | 3.11                | 1.64                | 53%                       | \$213,709.55    |
| 35–39                            | 8.03                 | 15.69               | 7.66                | 49%                       | \$880,639.94    |
| 40–44                            | 18.44                | 40.18               | 21.75               | 54%                       | \$2,657,824.91  |
| 45–49                            | 27.06                | 46.60               | 19.54               | 42%                       | \$1,832,306.88  |

| Age group | Parental PALYs lived | Control PALYs lived | Parental PALYs lost | Proportion of PALYs lost  | Cost to society |
|-----------|----------------------|---------------------|---------------------|---------------------------|-----------------|
| 50–54     | 29.03                | 54.98               | 25.95               | 47%                       | \$2,605,579.86  |
| 55–59     | 28.22                | 42.93               | 14.71               | 34%                       | \$1,192,684.91  |
| 60–64     | 28.51                | 32.34               | 3.83                | 12%                       | \$232,363.32    |
| 65–69     | 28.72                | 18.71               | (10.02)             | -54%                      | -\$347,881.31   |
| All ages  | 169.49               | 254.54              | 85.06               | 53%<br>(weighted average) | \$9,267,228.06  |

Note: A negative productivity loss was estimated for the 65-to-69-year age group due to the lack of age specific parental productivity indices, resulting in the parental population accruing greater PALYs in this age group than the control population.

**Table S8. The productivity burden borne by the mothers of persons with AS in Australia over a 10-year period**

| Age group                        | Parental PALYs lived | Control PALYs lived | Parental PALYs lost | Proportion of PALYs lost  | Cost to society  |
|----------------------------------|----------------------|---------------------|---------------------|---------------------------|------------------|
| <b>Upper prevalence scenario</b> |                      |                     |                     |                           |                  |
| 20–24                            | -                    | -                   | -                   | -                         | \$0.00           |
| 25–29                            | -                    | -                   | -                   | -                         | \$0.00           |
| 30–34                            | 12.38                | 42.97               | 30.59               | 71%                       | \$3,186,897.74   |
| 35–39                            | 60.13                | 180.28              | 120.16              | 67%                       | \$10,281,641.45  |
| 40–44                            | 104.94               | 351.65              | 246.71              | 70%                       | \$21,966,871.95  |
| 45–49                            | 113.72               | 354.45              | 240.73              | 68%                       | \$19,418,930.35  |
| 50–54                            | 117.75               | 399.30              | 281.55              | 71%                       | \$25,018,273.55  |
| 55–59                            | 123.23               | 340.99              | 217.75              | 64%                       | \$15,670,147.61  |
| 60–64                            | 126.22               | 244.00              | 117.78              | 48%                       | \$5,936,670.04   |
| 65–69                            | 135.72               | 127.07              | (8.65)              | -7%                       | -\$212,300.17    |
| All ages                         | 794.08               | 2,040.70            | 1,246.62            | 25%<br>(weighted average) | \$101,267,132.52 |
| <b>Lower prevalence scenario</b> |                      |                     |                     |                           |                  |
| 20–24                            | -                    | -                   | -                   | -                         | \$0.00           |
| 25–29                            | -                    | -                   | -                   | -                         | \$0.00           |
| 30–34                            | 1.44                 | 4.98                | 3.55                | 71%                       | \$369,495.39     |
| 35–39                            | 6.97                 | 20.90               | 13.93               | 67%                       | \$1,192,074.37   |
| 40–44                            | 12.17                | 40.77               | 28.60               | 70%                       | \$2,546,883.70   |
| 45–49                            | 13.19                | 41.10               | 27.91               | 68%                       | \$2,251,470.19   |

| Age group | Parental PALYs lived | Control PALYs lived | Parental PALYs lost | Proportion of PALYs lost  | Cost to society |
|-----------|----------------------|---------------------|---------------------|---------------------------|-----------------|
| 50–54     | 13.65                | 46.30               | 32.64               | 71%                       | \$2,900,669.40  |
| 55–59     | 14.29                | 39.53               | 25.25               | 64%                       | \$1,816,828.71  |
| 60–64     | 14.63                | 28.29               | 13.66               | 48%                       | \$688,309.57    |
| 65–69     | 15.74                | 14.73               | (1.00)              | -7%                       | -\$24,614.51    |
| All ages  | 92.07                | 236.60              | 144.54              | 25%<br>(weighted average) | \$11,741,116.81 |

Note: A negative productivity loss was estimated for the 65-to-69-year age group due to the lack of age specific parental productivity indices, resulting in the parental population accruing greater PALYs in this age group than the control population.



## Sensitivity analyses

**Table S9. Sensitivity analyses**

| Age group                                | PALYs lost |          |          | Cost to society  |                  |                  |
|------------------------------------------|------------|----------|----------|------------------|------------------|------------------|
|                                          | Fathers    | Mothers  | Total    | Fathers          | Mothers          | Total            |
| <b>Upper prevalence scenario</b>         |            |          |          |                  |                  |                  |
| Base case                                | 733.60     | 1,246.62 | 1,980.22 | \$79,929,842.02  | \$101,267,132.52 | \$181,196,974.54 |
| Average parental workforce participation |            |          |          |                  |                  |                  |
| -20%                                     | 1025.97    | 1405.44  | 2431.41  | \$103,797,549.00 | \$112,062,491.81 | \$215,860,040.81 |
| +20%                                     | 441.23     | 1,087.80 | 1,529.04 | \$56,062,135.05  | \$90,471,773.22  | \$146,533,908.27 |
| AS attributable absenteeism              |            |          |          |                  |                  |                  |
| -20%                                     | 664.72     | 1,209.21 | 1,873.93 | \$74,306,972.01  | \$98,723,909.49  | \$173,030,881.50 |
| +20%                                     | 802.48     | 1,284.03 | 2,086.52 | \$85,552,712.04  | \$103,810,355.55 | \$189,363,067.58 |
| AS attributable presenteeism             |            |          |          |                  |                  |                  |
| -20%                                     | 329.85     | 1,027.30 | 1,357.16 | \$46,969,675.25  | \$86,359,255.39  | \$133,328,930.65 |
| +20%                                     | 1,137.35   | 1,465.94 | 2,603.29 | \$112,890,008.80 | \$116,175,009.64 | \$229,065,018.44 |
| <b>Lower prevalence scenario</b>         |            |          |          |                  |                  |                  |
| Base case                                | 85.06      | 144.54   | 229.59   | \$9,267,228.06   | \$11,741,116.81  | \$21,008,344.87  |
| Average parental workforce participation |            |          |          |                  |                  |                  |
| -20%                                     | 118.95     | 162.95   | 281.90   | \$12,034,498.43  | \$12,992,752.67  | \$25,027,251.11  |
| +20%                                     | 51.16      | 126.12   | 177.28   | \$6,499,957.69   | \$10,489,480.95  | \$16,989,438.64  |

| Age group                    | PALYs lost |         |        | Cost to society |                 |                 |
|------------------------------|------------|---------|--------|-----------------|-----------------|-----------------|
|                              | Fathers    | Mothers | Total  | Fathers         | Mothers         | Total           |
| <hr/>                        |            |         |        |                 |                 |                 |
| AS attributable absenteeism  |            |         |        |                 |                 |                 |
| -20%                         | 77.07      | 140.20  | 217.27 | \$8,615,301.10  | \$11,446,250.38 | \$20,061,551.48 |
| +20%                         | 93.04      | 148.87  | 241.91 | \$9,919,155.02  | \$12,035,983.25 | \$21,955,138.27 |
| AS attributable presenteeism |            |         |        |                 |                 |                 |
| -20%                         | 38.24      | 119.11  | 157.35 | \$5,445,759.45  | \$10,012,667.29 | \$15,458,426.74 |
| +20%                         | 131.87     | 169.96  | 301.83 | \$13,088,696.67 | \$13,469,566.34 | \$26,558,263.01 |
| <hr/>                        |            |         |        |                 |                 |                 |

**Table S10. The magnitude of change observed in the results following the sensitivity analyses**

| Age group                                | PALYs lost |         |         | Cost to society |         |         |
|------------------------------------------|------------|---------|---------|-----------------|---------|---------|
|                                          | Fathers    | Mothers | Total   | Fathers         | Mothers | Total   |
| <b>Upper prevalence scenario</b>         |            |         |         |                 |         |         |
| Average parental workforce participation |            |         |         |                 |         |         |
| -20%                                     | 39.85%     | 12.74%  | 22.78%  | 29.86%          | 10.66%  | 19.13%  |
| +20%                                     | -39.85%    | -12.74% | -22.78% | -29.86%         | -10.66% | -19.13% |
| AS attributable absenteeism              |            |         |         |                 |         |         |
| -20%                                     | -9.39%     | -3.00%  | -5.37%  | -7.03%          | -2.51%  | -4.51%  |
| +20%                                     | 9.39%      | 3.00%   | 5.37%   | 7.03%           | 2.51%   | 4.51%   |
| AS attributable presenteeism             |            |         |         |                 |         |         |
| -20%                                     | -55.04%    | -17.59% | -31.46% | -41.24%         | -14.72% | -26.42% |
| +20%                                     | 55.04%     | 17.59%  | 31.46%  | 41.24%          | 14.72%  | 26.42%  |
| <b>Lower prevalence scenario</b>         |            |         |         |                 |         |         |
| Average parental workforce participation |            |         |         |                 |         |         |
| -20%                                     | 39.85%     | 12.74%  | 22.78%  | 29.86%          | 10.66%  | 19.13%  |
| +20%                                     | -39.85%    | -12.74% | -22.78% | -29.86%         | -10.66% | -19.13% |
| AS attributable absenteeism              |            |         |         |                 |         |         |
| -20%                                     | -9.39%     | -3.00%  | -5.37%  | -7.03%          | -2.51%  | -4.51%  |
| +20%                                     | 9.39%      | 3.00%   | 5.37%   | 7.03%           | 2.51%   | 4.51%   |
| AS attributable presenteeism             |            |         |         |                 |         |         |
| -20%                                     | -55.04%    | -17.59% | -31.46% | -41.24%         | -14.72% | -26.42% |

| Age group | PALYs lost |         |        | Cost to society |         |        |
|-----------|------------|---------|--------|-----------------|---------|--------|
|           | Fathers    | Mothers | Total  | Fathers         | Mothers | Total  |
| +20%      | 55.04%     | 17.59%  | 31.46% | 41.24%          | 14.72%  | 26.42% |

## References

1. Jørgensen IF, Russo F, Jensen AB, et al. Comorbidity landscape of the Danish patient population affected by chromosome abnormalities. *Genet Med*. 2019;21(11):2485-2495. doi:10.1038/s41436-019-0519-9
2. Petersen MB, Brøndum-Nielsen K, Hansen LK, Wulff K. Clinical, cytogenetic, and molecular diagnosis of Angelman syndrome: Estimated prevalence rate in a Danish county. *Am J Med Genet*. 1995;60(3):261-262. doi:10.1002/ajmg.1320600317
3. Disability, Ageing and Carers, Australia: Summary of Findings, 2018 | Australian Bureau of Statistics. <https://www.abs.gov.au/statistics/health/disability/disability-ageing-and-carers-australia-summary-findings/latest-release#data-download>. Accessed March 13, 2021.
4. Coppus AMW. People with intellectual disability: What do we know about adulthood and life expectancy? *Dev Disabil Res Rev*. 2013;18(1):6-16. doi:10.1002/ddrr.1123
5. Dagli A, Buiting K, Williams CA. Molecular and Clinical Aspects of Angelman Syndrome. *Mol Syndromol*. 2011;2(3-5):100-112. doi:10.1159/000328837
6. Births, Australia, 2019 | Australian Bureau of Statistics. <https://www.abs.gov.au/statistics/people/population/births-australia/latest-release#data-download>. Accessed March 20, 2021.
7. Baker EK, Godler DE, Bui M, et al. Exploring autism symptoms in an Australian cohort of patients with Prader-Willi and Angelman syndromes. *J Neurodev Disord*. 2018;10(1):24. doi:10.1186/s11689-018-9242-0
8. Campbell JD, Whittington MD, Kim CH, VanderVeen GR, Knupp KG, Gammaitoni A. Assessing the impact of caring for a child with Dravet syndrome: Results of a caregiver survey. *Epilepsy Behav*. 2018;80:152-156. doi:10.1016/j.yebeh.2018.01.003

9. Characteristics of Employment, Australia, August 2020 | Australian Bureau of Statistics. <https://www.abs.gov.au/statistics/labour/earnings-and-work-hours/characteristics-employment-australia/latest-release>. Accessed April 10, 2021.
10. Australian National Accounts: National Income, Expenditure and Product, December 2020 | Australian Bureau of Statistics. <https://www.abs.gov.au/statistics/economy/national-accounts/australian-national-accounts-national-income-expenditure-and-product/latest-release#data-download>. Accessed May 15, 2021.
11. National, state and territory population, June 2020 | Australian Bureau of Statistics. <https://www.abs.gov.au/statistics/people/population/national-state-and-territory-population/jun-2020#data-download>. Accessed March 13, 2021.
12. Deaths, Australia, 2019 | Australian Bureau of Statistics. <https://www.abs.gov.au/statistics/people/population/deaths-australia/latest-release>. Accessed March 27, 2021.
13. Larg A, Moss JR. Cost-of-Illness Studies. *Pharmacoeconomics*. 2011;29(8):653-671. doi:10.2165/11588380-000000000-00000
14. Luk HM, Lo IFM. Angelman syndrome in Hong Kong Chinese: A 20 years' experience. *Eur J Med Genet*. 2016;59(6-7):315-319. doi:10.1016/j.ejmg.2016.05.003
15. Thomson AK, Glasson EJ, Bittles AH. A long-term population-based clinical and morbidity profile of Angelman syndrome in Western Australia: 1953–2003. *Disabil Rehabil*. 2006;28(5):299-305. doi:10.1080/09638280500190631
16. Õiglane-Shlik E, Talvik T, Žordania R, et al. Prevalence of Angelman syndrome and Prader–Willi syndrome in Estonian children: Sister syndromes not equally represented. *Am J Med Genet Part A*. 2006;140A(18):1936-1943. doi:10.1002/ajmg.a.31423
17. Al Salloum A, El Mouzan MI, Al Herbish A, Al Omer A, Qurashi M. Prevalence of

- selected congenital anomalies in Saudi children: a community-based study. *Ann Saudi Med.* 2015;35(2):107-110. doi:10.5144/0256-4947.2015.107
18. Mertz LGB, Christensen R, Vogel I, et al. Angelman syndrome in Denmark. Birth incidence, genetic findings, and age at diagnosis. *Am J Med Genet Part A.* 2013;161(9):2197-2203. doi:10.1002/ajmg.a.36058
  19. Tones M, Cross M, Simons C, et al. Research protocol: The initiation, design and establishment of the Global Angelman Syndrome Registry. *J Intellect Disabil Res.* 2018;62(5):431-443. doi:10.1111/jir.12482
  20. Davies AF, Ogilvie CM. Prevalence of Angelman syndrome amongst referrals with epilepsy and developmental delay. *Am J Med Genet Part A.* 2007;143A(18):2189-2191. doi:10.1002/ajmg.a.31879
  21. Vercesi AML, Carvalho MRS, Aguiar MJB, Pena SDJ. Prevalence of Prader-Willi and Angelman syndromes among mentally retarded boys in Brazil [3]. *J Med Genet.* 1999;36(6):498. doi:10.1136/jmg.36.6.498
  22. Buckley RH, Dinno N, Weber P. Angelman syndrome: Are the estimates too low? *Am J Med Genet.* 1998;80(4):385-390. doi:10.1002/(SICI)1096-8628(19981204)80:4<385::AID-AJMG15>3.0.CO;2-9
  23. Hou J-W, Wang T-R, Chuang S-M. An epidemiological and aetiological study of children with intellectual disability in Taiwan. *J Intellect Disabil Res.* 1998;42(2):137-143. doi:10.1046/j.1365-2788.1998.00104.x
  24. Jacobsen J, King BH, Leventhal BL, Christian SL, Ledbetter DH, Cook EH. Molecular screening for proximal 15q abnormalities in a mentally retarded population. *J Med Genet.* 1998;35(7):534-538. doi:10.1136/jmg.35.7.534
  25. Sandanam T, Beange H, Robson L, Woolnough H, Buchholz T, Smith A. Manifestations in institutionalised adults with Angelman syndrome due to deletion. *Am*

*J Med Genet.* 1997;70(4):415-420. doi:10.1002/(SICI)1096-

8628(19970627)70:4<415::AID-AJMG16>3.0.CO;2-K

26. Steffenburg S, Gillberg CL, Steffenburg U, Kyllerman M. Autism in Angelman syndrome: a population-based study. *Pediatr Neurol.* 1996;14(2):131-136. doi:10.1016/0887-8994(96)00011-2
